# Supplementary material for: Contactins in the central nervous system: role in health and disease
Source: PubMed Central journal article supplement — Neural Regen Res. 2019 Feb;14(2):206–16. doi: 10.4103/1673-5374.244776 (PMC6301169; doi:10.4103/1673-5374.244776), 2019-02
Supplement: NRR-14-206_Suppl1.pdf [file NRR-14-206_Suppl1.pdf]

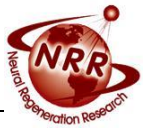

## PEER-REVIEW REPORT 1

**Name of journal:** Neural Regeneration Research

**Manuscript NO:** NRR-D-18-00514

**Title:** Contactins in the central nervous system: role in health and disease

**Reviewer's Name:** Dario Siniscalco

**Reviewer's country:** Italy

**Date sent for review:** 2018-08-13

**Date reviewed:** 2018-09-03

**Review time:** 20 Days

### COMMENTS TO AUTHORS

In this review article, the authors focalize on contactins.

While the description of the six members is complete and well done, authors failed to provide evidence between contactins involvement in autism spectrum disorders. They tentatively describe a potential link, however no description of autism is done (in the title also is absent), neither the basis of autism is given. Why they did correlate contactins and autism?
